# Supplementary material for: Studying Plant–Insect Interactions through the Analyses of the Diversity, Composition, and Functional Inference of Their Bacteriomes
Source: MDPI journal article supplement (doi:10.3390/microorganisms11010040), 2022-12-22
Supplement: s1 [file s1]

## SUPPLEMENTARY MATERIAL

### Supplementary Figures

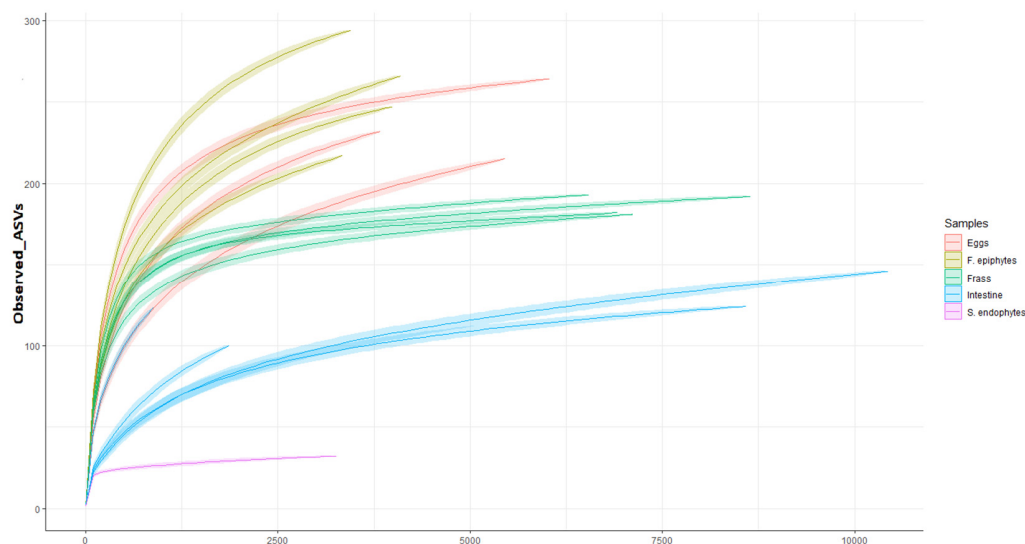

**Figure S1.** Rarefaction curves of the observed ASVs in the eleven samples of the insect and the five samples of the plant. Due to the few identified ASVs, foliar endophyte samples were discarded from the analysis of diversity and only one seed sample was kept in it.

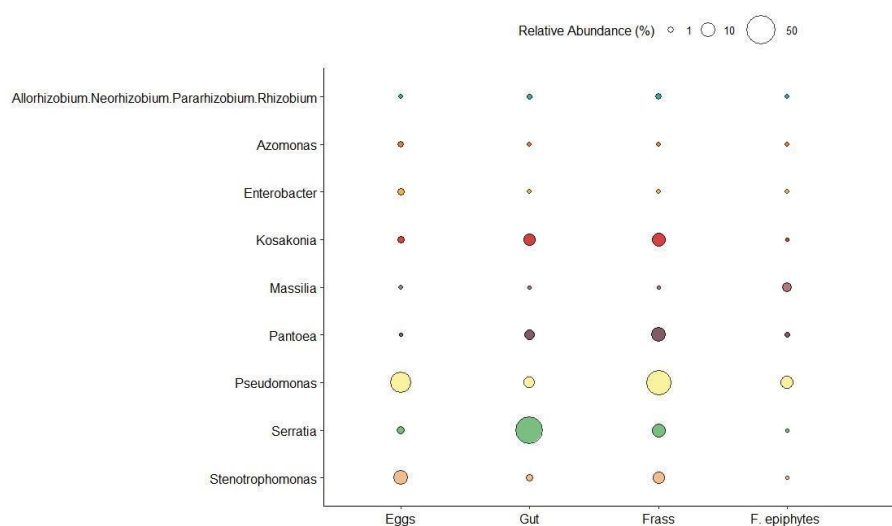

**Figure S2.** Relative abundance of some genera shared among insects samples (eggs, guts and frass) and plant samples (foliar endophytes). Only shared ASVs with abundances greater than 0.1% are shown.

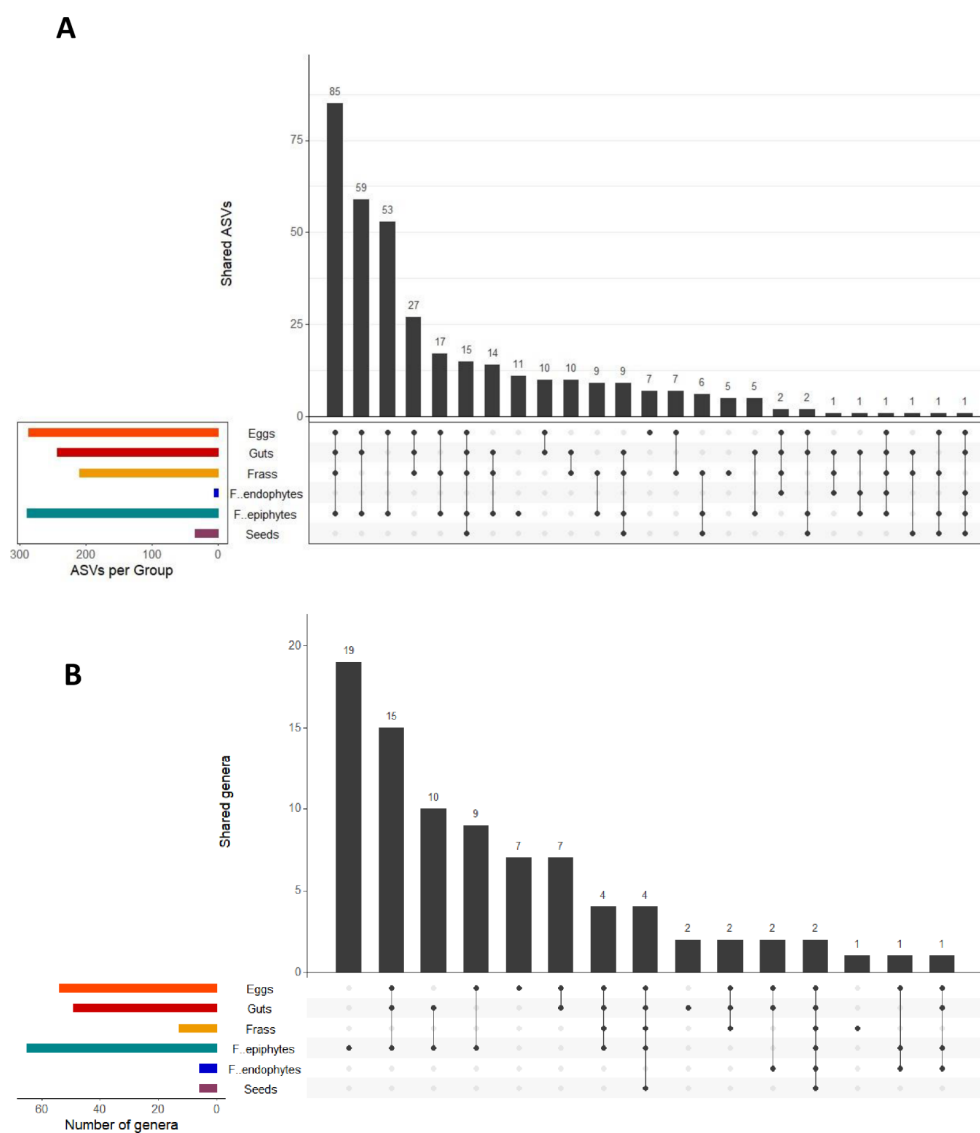

**Figure S3.** Shared ASVs (A) and genera (B) between insect and plant samples. Only shared ASVs and genera with abundances greater than 0.1% are shown.

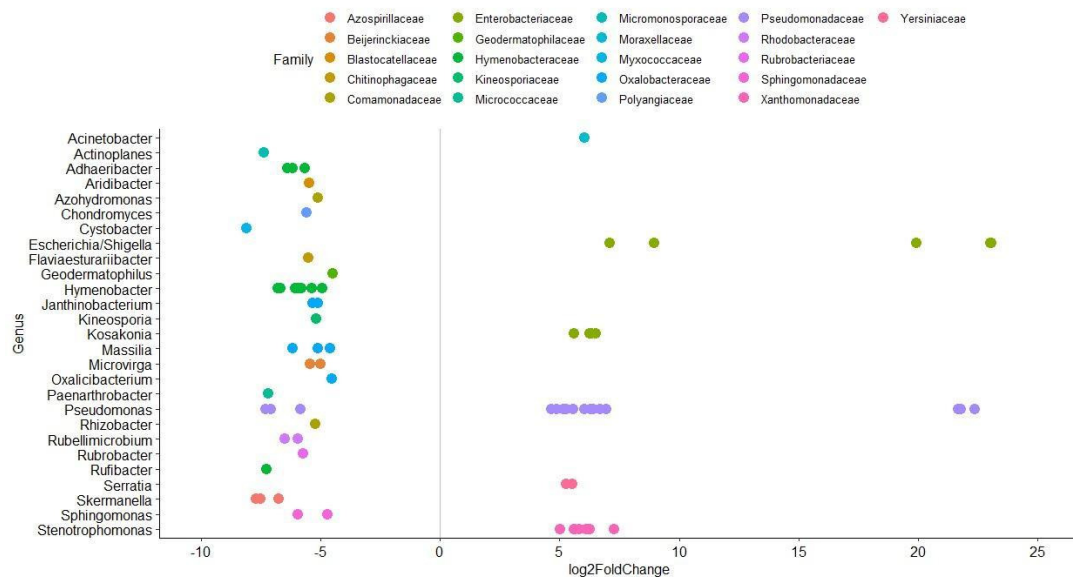

**Figure S4.** Genera with significant differences in abundances when comparing insect (eggs, gut and frass) and plant (foliar epiphytes) samples. The x-axis represents the values of log2FoldChange. Negative values indicate that the abundances of such genera are higher in the plant. Positive values indicate those genera are more abundant in the insect. This comparison was made with the DESeq2 function, with a Wald test and a  $P < 0.01$ .

## Supplementary Tables

**Table S1.** Summary of the sequences and ASVs analyzed per sample.

| sample        | input | filtered | denoisedF | nonchim | # reads | # ASV |
|---------------|-------|----------|-----------|---------|---------|-------|
| seeds1        | 37483 | 12836    | 12801     | 11622   | 5       | 5     |
| seeds2        | 36103 | 12748    | 12680     | 11235   | 3262    | 32    |
| seeds3        | 40324 | 15056    | 14981     | 13749   | 0       | 0     |
| seeds4        | 45385 | 14652    | 14617     | 13264   | 1       | 1     |
| f_epiphytes1  | 40592 | 12671    | 12215     | 10849   | 4098    | 266   |
| f_epiphytes2  | 37271 | 12128    | 11466     | 10688   | 3345    | 217   |
| f_epiphytes3  | 33386 | 11242    | 10857     | 9908    | 3985    | 247   |
| f_epiphytes4  | 31849 | 8718     | 8041      | 7473    | 3452    | 294   |
| f_endophytes1 | 32208 | 13081    | 13071     | 12247   | 2       | 2     |
| f_endophytes2 | 35438 | 12349    | 12332     | 11558   | 2       | 2     |
| f_endophytes3 | 40358 | 13869    | 13857     | 12954   | 0       | 0     |
| f_endophytes4 | 31146 | 11292    | 11284     | 10679   | 3       | 3     |
| eggs1         | 35702 | 12749    | 12408     | 11100   | 6035    | 264   |
| eggs2         | 29761 | 9033     | 8929      | 7976    | 5450    | 215   |
| eggs4         | 27033 | 10246    | 10141     | 9211    | 3828    | 232   |
| gut1          | 41745 | 14095    | 14011     | 13491   | 1870    | 100   |
| gut2          | 45994 | 16286    | 16204     | 15795   | 873     | 123   |
| gut3          | 46433 | 15735    | 15669     | 14647   | 8589    | 124   |
| gut4          | 37873 | 13081    | 13038     | 11669   | 10431   | 146   |
| frass1        | 34608 | 11589    | 11501     | 9540    | 8644    | 192   |
| frass2        | 27645 | 9529     | 9441      | 7894    | 7107    | 181   |
| frass3        | 27644 | 9625     | 9545      | 8051    | 6543    | 193   |
| frass4        | 31103 | 9698     | 9632      | 8613    | 6919    | 182   |

**Table S2.** Shared genera among the plant bacteriome with different combinations of the insect samples. Only shared ASVs with abundances greater than 0.1% are shown.

| Sample combinations                   | # ASVs | # Genera | Genera                                                                                                                                                                                                                                                                                                                                                                                                                                                                                                                                                                                                                                                                                                                                                                                                                                                                                                  |
|---------------------------------------|--------|----------|---------------------------------------------------------------------------------------------------------------------------------------------------------------------------------------------------------------------------------------------------------------------------------------------------------------------------------------------------------------------------------------------------------------------------------------------------------------------------------------------------------------------------------------------------------------------------------------------------------------------------------------------------------------------------------------------------------------------------------------------------------------------------------------------------------------------------------------------------------------------------------------------------------|
| all plant samples & eggs              | 257    | 38       | <i>Allorhizobium-Neorhizobium-Pararhizobium-Rhizobium</i> , <i>Aureimonas</i> , <i>Azomonas</i> , <i>Bacillus</i> , <i>Blastococcus</i> , <i>Brucella</i> , <i>Clostridium</i> , <i>Delftia</i> , <i>Enterobacter</i> , <i>Escherichia/Shigella</i> , <i>Gaiella</i> , <i>Hymenobacter</i> , <i>Janthinobacterium</i> , <i>Kineococcus</i> , <i>Kosakonia</i> , <i>Lawsonella</i> , <i>Lechevalieria</i> , <i>Leifsonia</i> , <i>Marmoricola</i> , <i>Massilia</i> , <i>Methylobacterium-Methylobacterium</i> , <i>Microbacterium</i> , <i>Microvirga</i> , <i>Modestobacter</i> , <i>Nocardioides</i> , <i>Oxalicibacterium</i> , <i>Pantoea</i> , <i>Paraclostridium</i> , <i>Paracoccus</i> , <i>Pseudomonas</i> , <i>Pseudocardia</i> , <i>Roseomonas</i> , <i>Serratia</i> , <i>Siccibacter</i> , <i>Sphingobacterium</i> , <i>Sphingomonas</i> , <i>Stenotrophomonas</i> , <i>Streptococcus</i>   |
| all plant samples & guts              | 197    | 37       | <i>Allorhizobium-Neorhizobium-Pararhizobium-Rhizobium</i> , <i>Azomonas</i> , <i>Bacillus</i> , <i>Brucella</i> , <i>Enterobacter</i> , <i>Escherichia/Shigella</i> , <i>Geodermatophilus</i> , <i>Hymenobacter</i> , <i>Janthinobacterium</i> , <i>Kineococcus</i> , <i>Kocuria</i> , <i>Kosakonia</i> , <i>Lawsonella</i> , <i>Lechevalieria</i> , <i>Leptolyngbya</i> , <i>Marmoricola</i> , <i>Massilia</i> , <i>Methylobacterium-Methylobacterium</i> , <i>Microbacterium</i> , <i>Microvirga</i> , <i>Modestobacter</i> , <i>Nocardioides</i> , <i>Noviherbaspirillum</i> , <i>Paenarthrobacter</i> , <i>Pantoea</i> , <i>Paraclostridium</i> , <i>Paracoccus</i> , <i>Parviterribacter</i> , <i>Pseudomonas</i> , <i>Rickettsiella</i> , <i>Roseomonas</i> , <i>Rubellimicrobium</i> , <i>Serratia</i> , <i>Siccibacter</i> , <i>Skermanella</i> , <i>Sphingomonas</i> , <i>Stenotrophomonas</i> |
| all plant samples & frass             | 188    | 10       | <i>Allorhizobium-Neorhizobium-Pararhizobium-Rhizobium</i> , <i>Azomonas</i> , <i>Enterobacter</i> , <i>Kosakonia</i> , <i>Massilia</i> , <i>Pantoea</i> , <i>Pseudomonas</i> , <i>Serratia</i> , <i>Siccibacter</i> , <i>Stenotrophomonas</i>                                                                                                                                                                                                                                                                                                                                                                                                                                                                                                                                                                                                                                                           |
| foliar epiphytes & all insect samples | 85     | 15       | <i>Allorhizobium-Neorhizobium-Pararhizobium-Rhizobium</i> , <i>Azomonas</i> , <i>Enterobacter</i> , <i>Kosakonia</i> , <i>Massilia</i> , <i>Pantoea</i> , <i>Pseudomonas</i> , <i>Serratia</i> , <i>Siccibacter</i> , <i>Stenotrophomonas</i>                                                                                                                                                                                                                                                                                                                                                                                                                                                                                                                                                                                                                                                           |
